# Supplementary figures and images for: Dual sex-specific functions ofDrosophilaUpstream of N-ras in the control of X chromosome dosage compensation
Source: Oxford University Press journal article supplement (doi:10.1242/dev.027656), 2009-01-23

**A**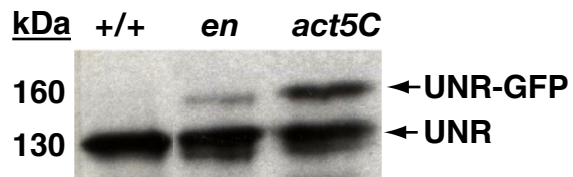**B**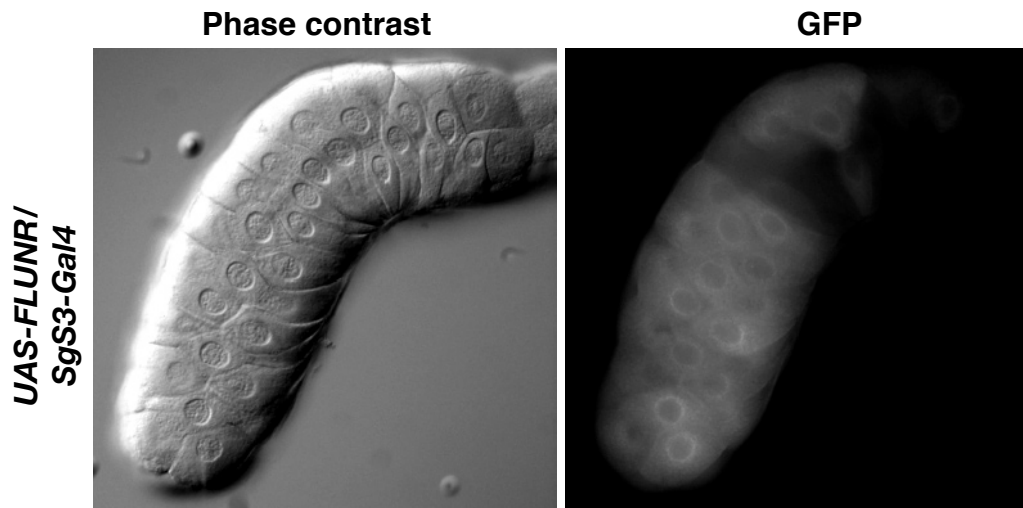

Supplement: dev027656-sup-027656-figs1.pdf [file dev027656-sup-027656-figs1.pdf]

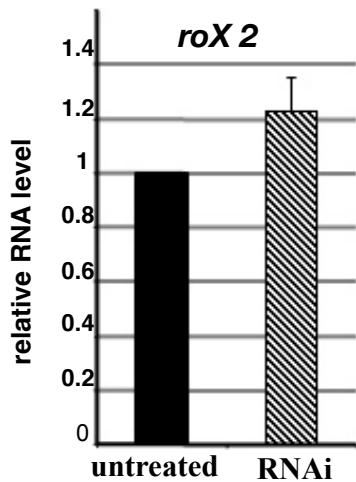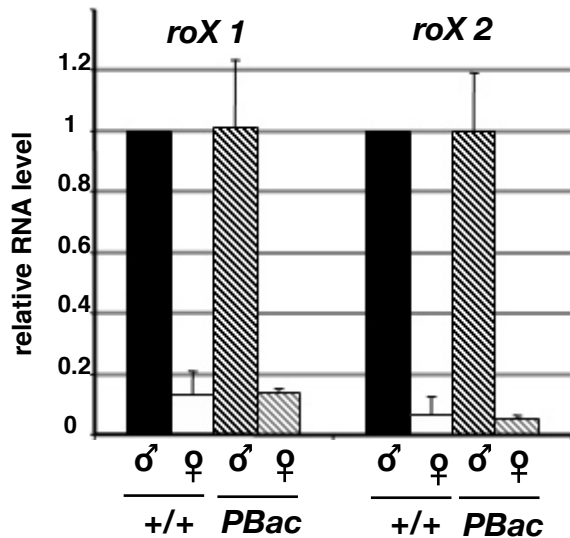

Supplement: dev027656-sup-027656-figs2.pdf [file dev027656-sup-027656-figs2.pdf]

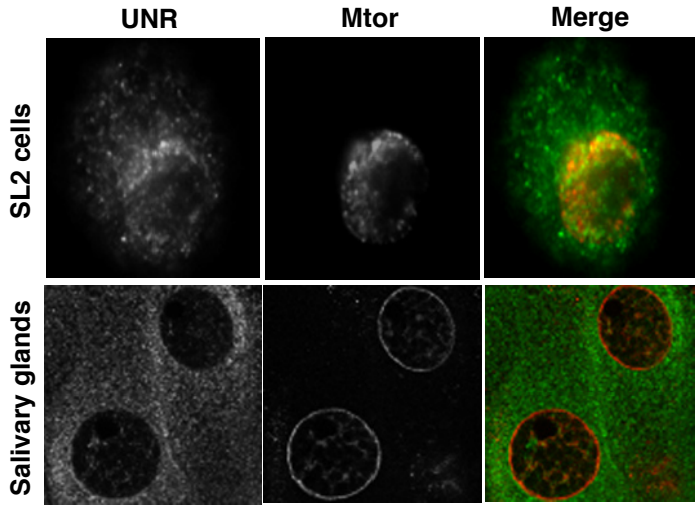

Supplement: dev027656-sup-027656-figs3.pdf [file dev027656-sup-027656-figs3.pdf]
